# Supplementary material
Source: PubMed Central journal article supplement (PMC3378512)
Supplement: NIHMS40356-supplement-01.pdf [file NIHMS40356-supplement-01.pdf]

| <i>ASPRV1</i>        | Primer sequence 5' - 3'                             | Reporter 1 probe (VIC) | Reporter 2 probe (FAM) |
|----------------------|-----------------------------------------------------|------------------------|------------------------|
| c.220 G>A<br>p.V74I  | F: CGCCGACACTGCTCTGT<br>R: CTGCTGCTCTCCTCTGGAA      | TTGGCGTGGGTTGC         | TGGCGTGGATTGC          |
| c.259 G>A<br>p.G87R  | F: GTTCCAGAGGAGAGCAGCAG<br>R: ACGACATTGGCCCCATCAAAA | CCGCTCCCGGCCAT         | TCCGCTCCTGGCCAT        |
| c.559 G>A<br>p.V187I | F: CCCTCCTGAAGGCCTTTGG<br>R: AGCCCTTACCCATGCTGTTG   | CCCAAAGAGATCGTCTTT     | CCAAAGAGATCATCTTT      |
| c.728 T>C<br>p.V243A | F: CACCCTGCAGCCCTTTGA<br>R: CACCGCTGTATCCCAGACA     | CCACCTTTACCACATTC      | ACCTTTGCCACATTC        |
| c.998 C>T<br>p.S333F | F: GGTCCCTGGAAGATGAGTTTGAC<br>R: GCTCCTGCCGCCCTT    | AGGACCCCTCCTCAGAAG     | AGGACCCCTTCTCAGAAG     |

**Supplementary Table 1. Primer and probe sequences of custom-designed Taqman® SNP genotyping assays for the *ASPRV1* mutations V74I, G87R, V187I, V243A and S333F.**

For genotyping, 10ng of genomic DNA was amplified in a 10µl reaction volume using Type-it Fast SNP Probe PCR master mix (Qiagen), 0.9µM of each primer, 0.2 µM of each probe and ran on a 7900HT Fast Real-Time PCR system (Applied Biosystems) using the manufacturer's recommended cycling conditions of 95°C for 10 minutes followed by 40 cycles of 92°C for 15 sec and 60°C for 1 minute.

|                            | Irish atopic eczema cases | Irish population controls |  | Scottish dry skin cases | Scottish population controls |
|----------------------------|---------------------------|---------------------------|--|-------------------------|------------------------------|
| <b>Genotype</b>            |                           |                           |  |                         |                              |
| <b>AA</b>                  | 84                        | 95                        |  | 38                      | 17                           |
| <b>AG</b>                  | 228                       | 216                       |  | 80                      | 54                           |
| <b>GG</b>                  | 130                       | 147                       |  | 49                      | 29                           |
| <b>Total number</b>        | 442                       | 458                       |  | 167                     | 100                          |
| <b>chi-square p value</b>  | 0.415                     |                           |  | 0.479                   |                              |
| <b>odds ratio (95% CI)</b> | 0.98<br>(0.81 to 1.18)    |                           |  | 0.90<br>(0.63 to 1.28)  |                              |

**Supplementary Table 2. Results of SNP genotyping and statistical analyses of case-control studies to investigate the association of *ASPRV1* mutation T49A with atopic eczema and clinically dry skin.**

The *ASPRV1* mutation T49A (rs3796097) was screened using a Taqman® validated SNP genotyping assay (assay ID c\_11540993\_10, Applied Biosystems). 10ng of genomic DNA was amplified in a 10µl reaction volume using Type-it Fast SNP Probe PCR master mix (Qiagen), 0.9µM of each primer, 0.2 µM of each probe and ran on a 7900HT Fast Real-Time PCR system (Applied Biosystems) using the manufacturer's recommended cycling conditions. Chi-square and logistic regression analyses were performed using the statistical analysis package Stata (StataCorp LP, College Station, TX); CI, confidence interval.

|                                    | <i>FLG</i> wild-type<br>Irish atopic<br>eczema cases | <i>FLG</i> wild-type<br>Irish<br>population<br>controls |  | <i>FLG</i> wild-type<br>Scottish dry skin<br>cases | <i>FLG</i> wild-type<br>Scottish<br>population<br>controls |
|------------------------------------|------------------------------------------------------|---------------------------------------------------------|--|----------------------------------------------------|------------------------------------------------------------|
| <b>Genotype</b>                    |                                                      |                                                         |  |                                                    |                                                            |
| <b>AA</b>                          | 52                                                   | 81                                                      |  | 19                                                 | 16                                                         |
| <b>AG</b>                          | 150                                                  | 190                                                     |  | 45                                                 | 47                                                         |
| <b>GG</b>                          | 77                                                   | 132                                                     |  | 36                                                 | 25                                                         |
| <b>Total<br/>number</b>            | 279                                                  | 403                                                     |  | 100                                                | 88                                                         |
| <b>chi-<br/>square p<br/>value</b> | 0.217                                                |                                                         |  | 0.467                                              |                                                            |
| <b>odds ratio<br/>(95% CI)</b>     | 0.93<br>(0.75 to 1.15)                               |                                                         |  | 1.15<br>(0.79 to 1.73)                             |                                                            |

**Supplementary Table 3. Results of SNP genotyping and statistical analyses of case-control studies to investigate the association of *ASPRV1* mutation T49A with atopic eczema and clinically dry skin in *FLG* wild-type individuals.**

*FLG* null mutations (R501X, 2282del4, R2447X and S3247X) were screened as previously reported (Kezic *et al.* 2011) and only those individuals with *FLG* wild-type results for each of these four mutations were included in this subgroup analysis. Chi-square and logistic regression analyses were performed using the statistical analysis package Stata (StataCorp LP, College Station, TX); CI, confidence interval.

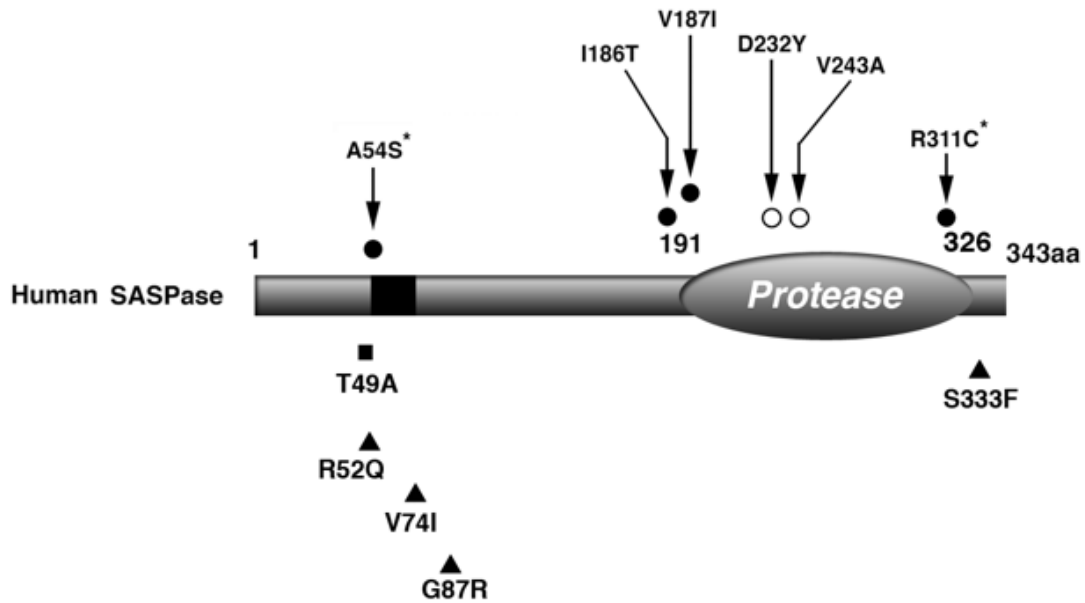

**Supplementary Figure 1. Schematic representation of the human SASPase protein (based on Matsui *et al*, 2011).** The protease active site is located between amino acid residues 191 to 326 and a putative transmembrane sequence is found between amino acid residues 57 to 75. Arrows denote the *ASPRV1* mutations previously identified in atopic eczema patients (filled circles; asterisks indicate mutations identified in the same patient) and controls (open circles). Arrowheads denote the *ASPRV1* missense mutations identified in the discovery cohorts in this study. The position of the T49A mutation is indicated by a filled box.
